# Supplementary material for: Hollow sphere formation by the self aggregation of perovskite fluoride NaNiF3 nanocrystals and the application of these spheres as an electrode in an ultrahigh performance asymmetric supercapacitor
Source: Royal Society of Chemistry journal article supplement (doi:10.1039/c9nj02221j), 2019-01-01
Supplement: c9nj02221j1.pdf [file c9nj02221j1.pdf]

## Supporting Information

### **Hollow Sphere Formation by Self Aggregation of Nanocrystals Perovskite Fluoride $\text{NaNiF}_3$ and Ultrahigh Performance Asymmetric Supercapacitor**

*Nadeem Hussain,<sup>1</sup> Fangfang Wu,<sup>4</sup> Waqar Younas,<sup>3</sup> and Liqiang Xu<sup>1,2,\*</sup>*

<sup>1</sup>Key Laboratory of Colloid & Interface Chemistry, Ministry of Education and School of Chemistry and Chemical Engineering, Shandong University, Jinan, 250100, China.

<sup>2</sup>Shandong Provincial Key Laboratory/Collaborative Innovation Center of Chemical Energy Storage & Novel Cell Technology, Liaocheng University, Liaocheng City 252059, China

<sup>3</sup>Research Center of Materials Science, Beijing Key Laboratory of Construction Tailorable Advanced Functional Materials and Green Applications, Beijing Institute of Technology, Beijing, 100081, China

<sup>4</sup>College of Materials Science and Engineering, Zhejiang University of Technology, 18 Chaowang Road, Hangzhou 310014, China

Corresponding Author

Email: [xulq@sdu.edu.cn](mailto:xulq@sdu.edu.cn)

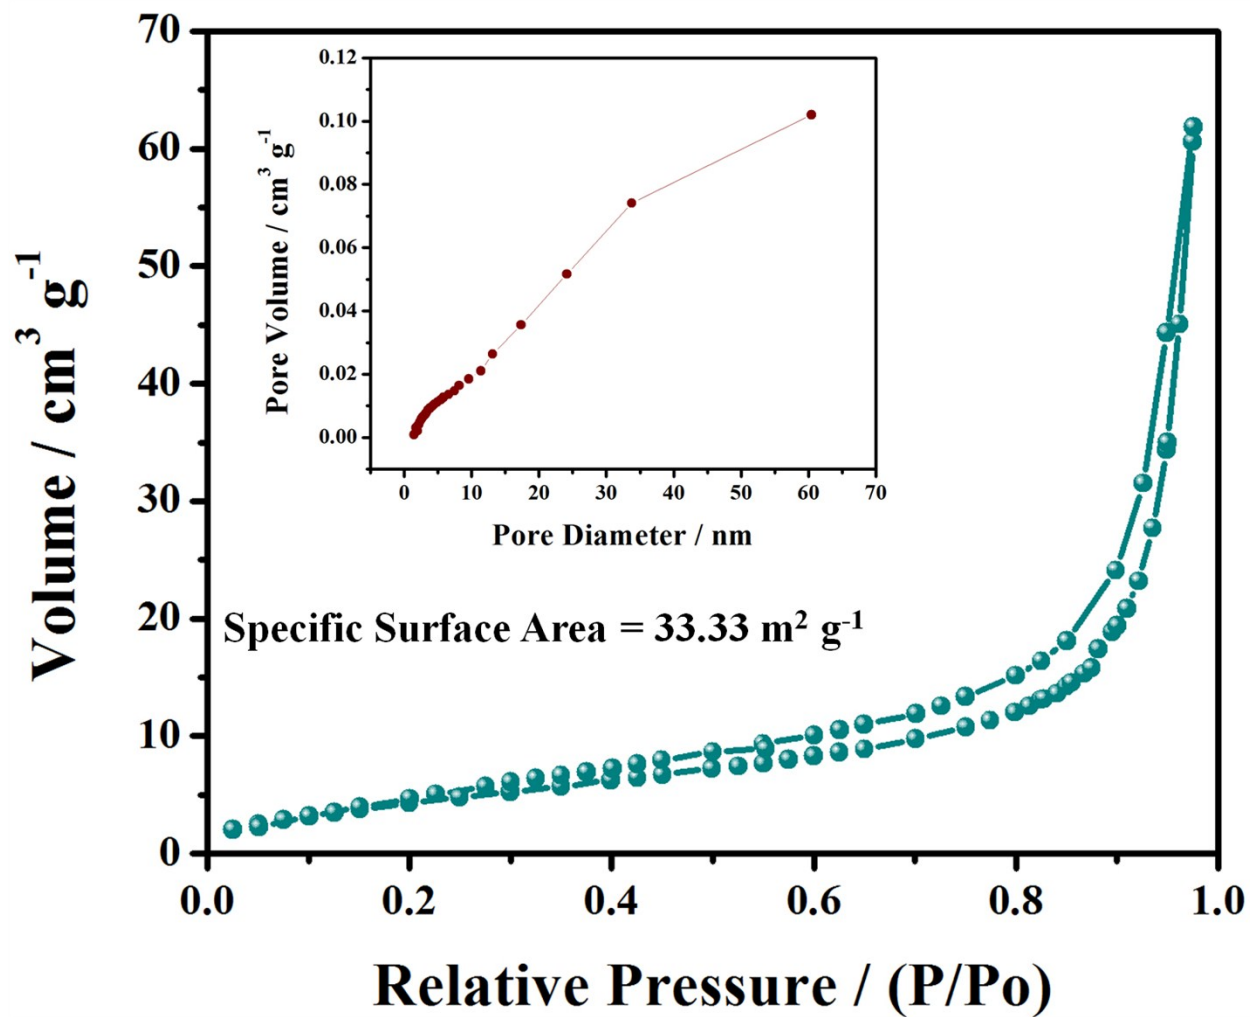

**Fig. S1** Adsorption-desorption isotherm and Pore size distribution of as prepared hollow spheres Perovskite fluoride NaNiF<sub>3</sub>.

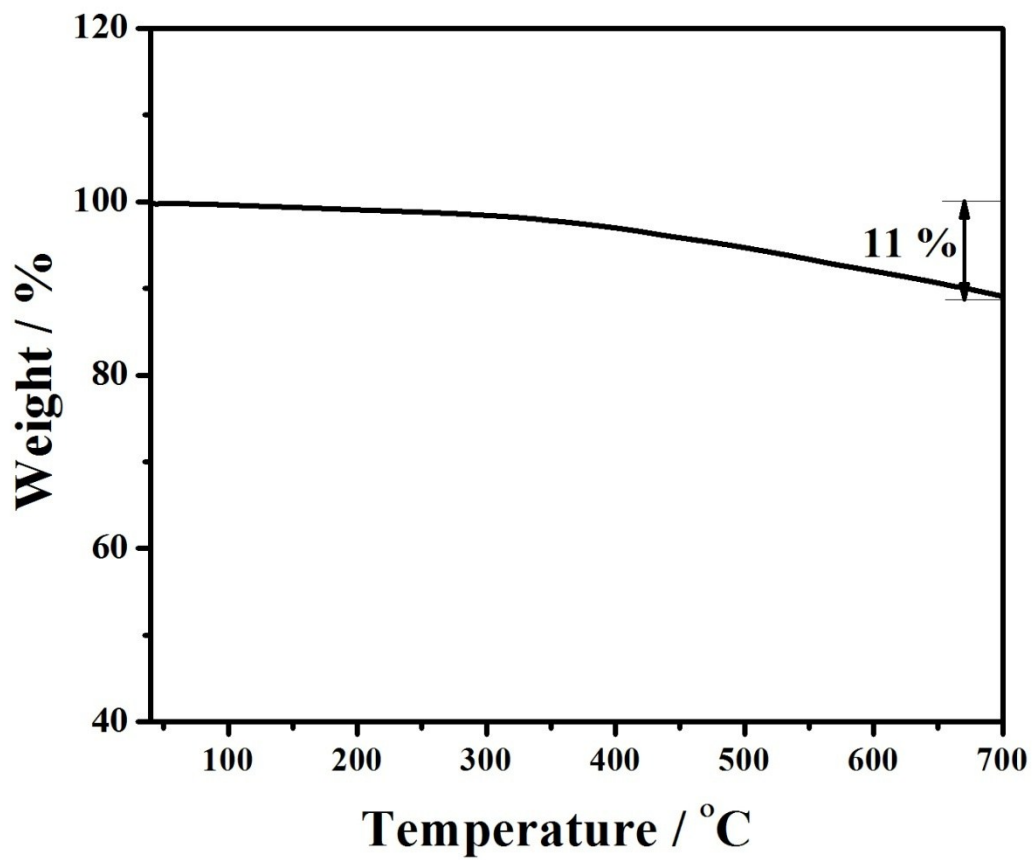

**Fig. S2** TGA curve obtained from 10 to 700 °C in air of as prepared hollow spheres Perovskite fluoride NaNiF<sub>3</sub>

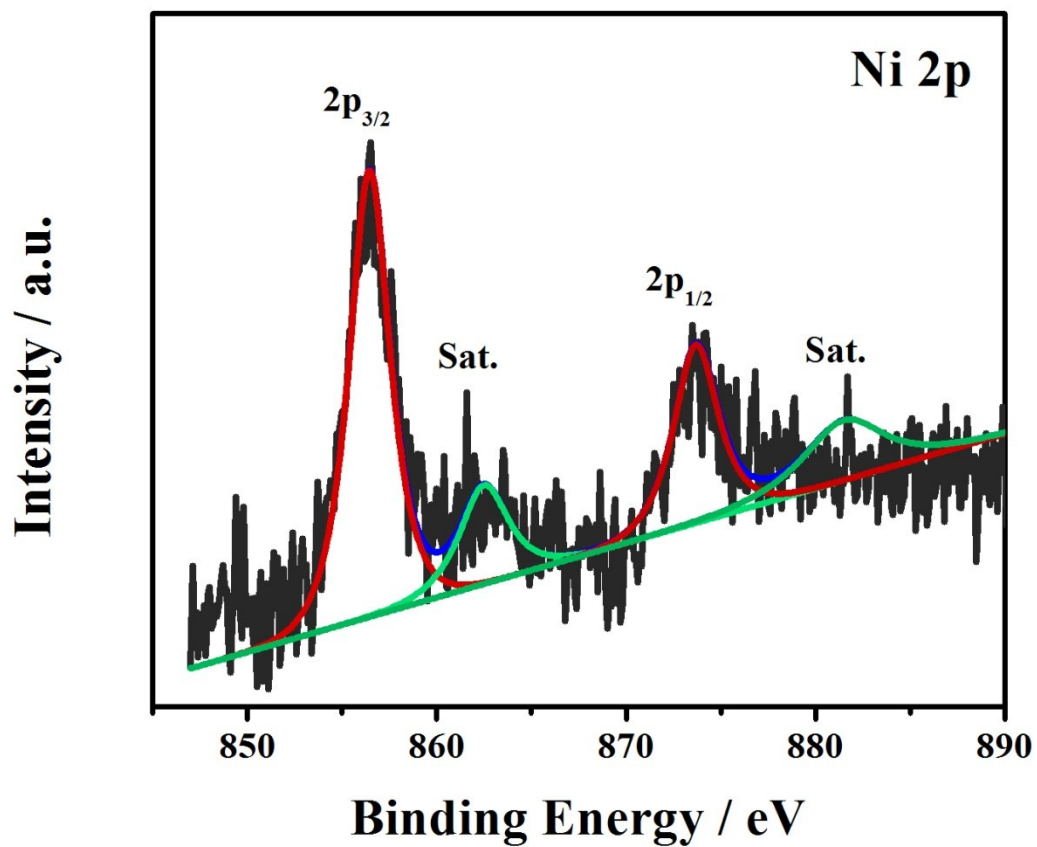

**Fig. S3** Ni 2p XPS spectra of NaNiF<sub>3</sub> at charged state in three-electrode system.

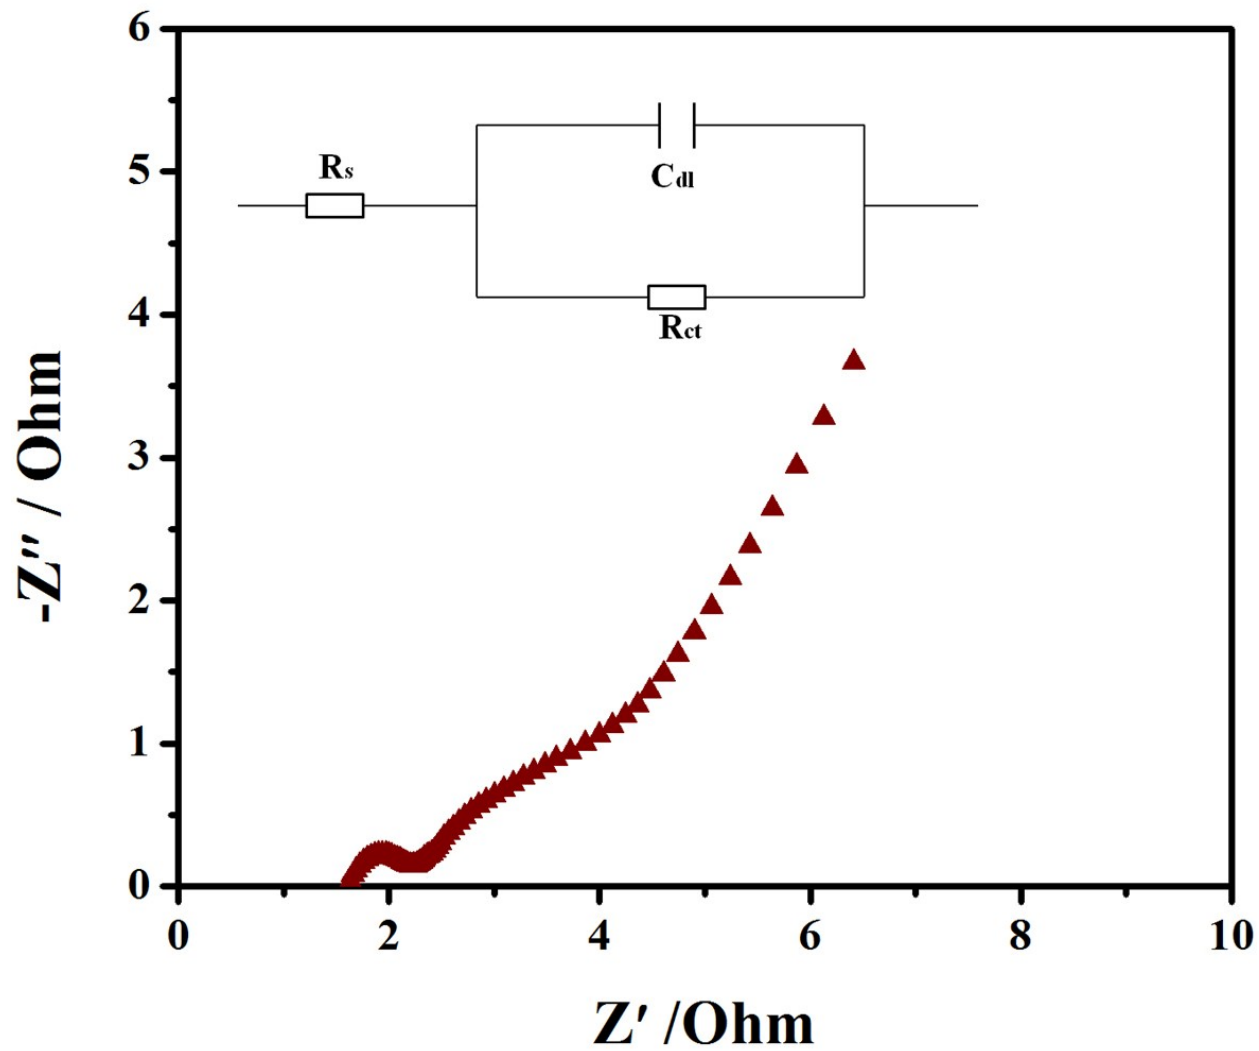

**Fig. S4** Nyquist plots of perovskite fluorides  $\text{NaNiF}_3$  measured at open circuit potential.

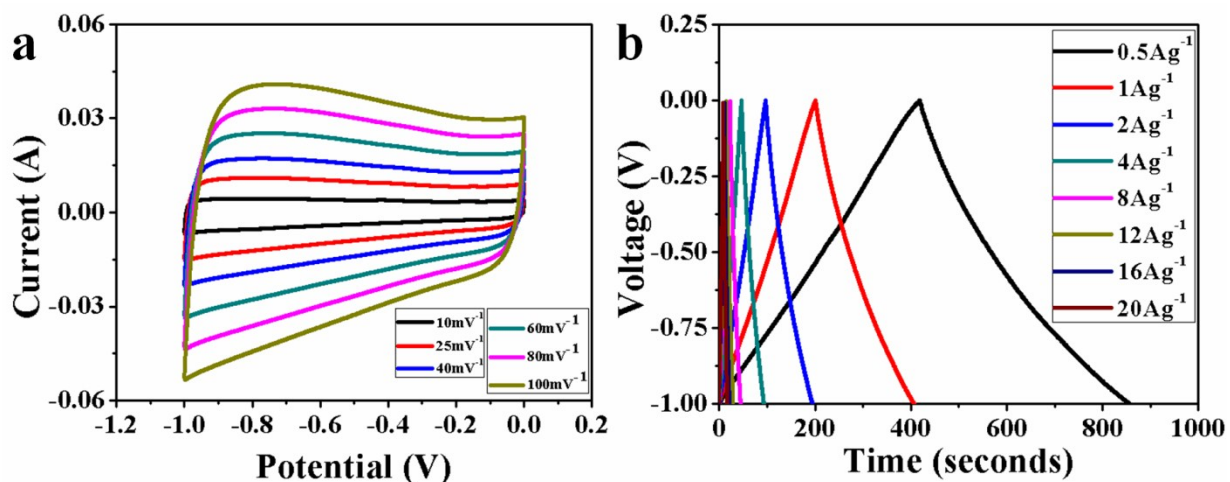

**Fig. S5** (a) CV curves of AC at different scan rates (10-100 mV s<sup>-1</sup>) within the voltage window from -1 to 0 V. (b) Galvanostatic charging/discharging curves of activated carbon at different current densities within voltage window -1~0 V

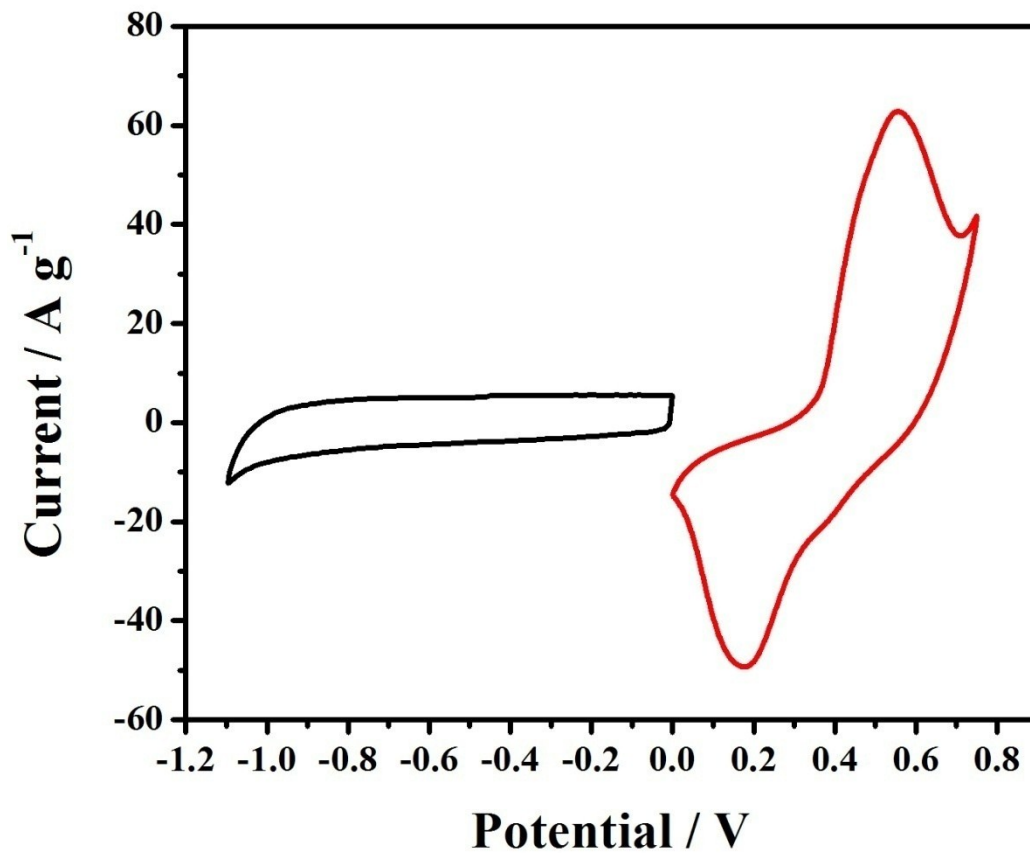

**Fig. S6** CV curves of AC and NaNiF<sub>3</sub> hollow spheres at scan rate of 20 mV s<sup>-1</sup> in a mixture of KOH and LiOH (3M+0.5M).

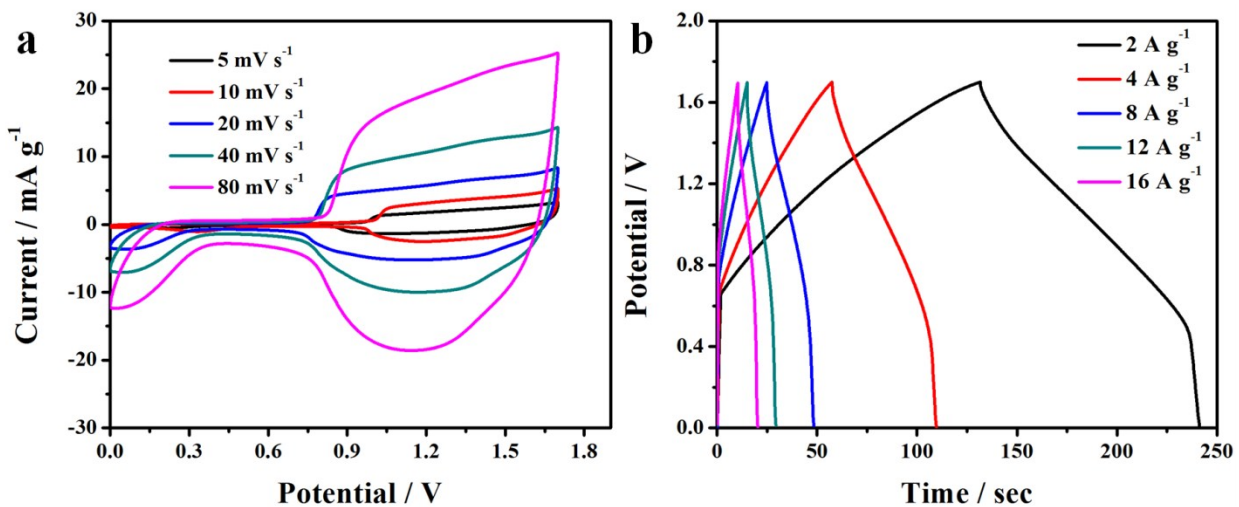

**Figure S 7 Electrochemical performance of NaNiF<sub>3</sub>//AC ASC device using carbon paper as current collector.** (a) CV curves at different scan rates (5-80 mV s<sup>-1</sup>) within the voltage window 0-1.7 V. (b) Galvanostatic charging/discharging curves at different current densities within voltage window 0-1.7 V.

**Table S1. Three electrode performance Comparison of hollow sphere perovskite fluorides NaNiF<sub>3</sub> with reported perovskite fluorides, perovskite oxides and other state of art electrode materials.**

| Electrode material                                                                                | Electrolyte                           | Specific Capacitance                             | Current density            | Stability                | Ref.      |
|---------------------------------------------------------------------------------------------------|---------------------------------------|--------------------------------------------------|----------------------------|--------------------------|-----------|
| NaNiF <sub>3</sub>                                                                                | 3 M KOH + 0.5 M LiOH                  | 1342 F g <sup>-1</sup>                           | 5 A g <sup>-1</sup>        | 90 % after 8,000 cycles  | This work |
| <b>Perovskite Fluorides</b>                                                                       |                                       |                                                  |                            |                          |           |
| KNi <sub>0.8</sub> Co <sub>0.2</sub> F <sub>3</sub>                                               | 3 M KOH + 0.5 M LiOH                  | 1530 F g <sup>-1</sup>                           | 1 A g <sup>-1</sup>        | -                        | 1         |
| K-Co-Mn-F                                                                                         | 3 M KOH + 0.5 M LiOH                  | 226 F g <sup>-1</sup>                            | 1 A g <sup>-1</sup>        | 118 % after 5,000 cycles | 2         |
| <b>Perovskite Oxides</b>                                                                          |                                       |                                                  |                            |                          |           |
| SrCo <sub>0.9</sub> Nb <sub>0.1</sub> O <sub>3-δ</sub>                                            | 6 M KOH                               | 786.1 F g <sup>-1</sup>                          | 1 A g <sup>-1</sup>        | 95.7 % after 3000 cycles | 3         |
| SrRuO <sub>3</sub> ;<br>La <sub>0.2</sub> Sr <sub>0.8</sub> Mn <sub>0.2</sub> Ru <sub>0.8</sub> O | 6 M KOH                               | 270 F g <sup>-1</sup> ;<br>160 F g <sup>-1</sup> | 20 mV s <sup>-1</sup>      |                          | 4         |
| BiFeO <sub>3</sub>                                                                                | 1 M NaOH                              | 81 F g <sup>-1</sup>                             | 20 mV s <sup>-1</sup>      |                          | 5         |
| TiO <sub>2</sub> /BiFeO <sub>3</sub>                                                              | 0.5 M Na <sub>2</sub> SO <sub>4</sub> | 440 F g <sup>-1</sup>                            | 1.1 A g <sup>-1</sup>      |                          | 6         |
| LaNiO <sub>3</sub> ;<br>MnO <sub>x</sub> /LaNiO <sub>3</sub>                                      | 1 M Na <sub>2</sub> SO <sub>4</sub>   | 6.2; 160 F g <sup>-1</sup>                       | 10; 0.01 V s <sup>-1</sup> |                          | 7         |
| LaNiO <sub>3</sub> /NiO                                                                           | 7 M KOH                               | 213.2 F g <sup>-1</sup>                          | 1 A g <sup>-1</sup>        |                          | 8         |
| La <sub>0.85</sub> Sr <sub>0.15</sub> MnO <sub>3</sub> ;LaMnO <sub>3</sub>                        | 1 M KOH                               | 198;187 F g <sup>-1</sup>                        | 0.5 A g <sup>-1</sup>      |                          | 9         |
| (La <sub>0.75</sub> Sr <sub>0.25</sub> ) <sub>0.95</sub> MnO <sub>3-δ</sub>                       | 1 M Na <sub>2</sub> SO <sub>4</sub>   | 56 F g <sup>-1</sup>                             | 2 mV s <sup>-1</sup>       |                          | 10        |
| La <sub>x</sub> Sr <sub>1-x</sub> NiO <sub>3-δ</sub>                                              | 1 M Na <sub>2</sub> SO <sub>4</sub>   | 719 F g <sup>-1</sup>                            | 2 A g <sup>-1</sup>        |                          | 11        |
| La <sub>x</sub> Sr <sub>1-x</sub> Co <sub>0.1</sub> Mn <sub>0.9</sub> O <sub>3-δ</sub>            | 1 M KOH                               | 485 F g <sup>-1</sup>                            | 1 A g <sup>-1</sup>        |                          | 12        |



|                                         |  |                                                     |                     |    |
|-----------------------------------------|--|-----------------------------------------------------|---------------------|----|
| LaMO <sub>3</sub><br>(M=Ni, Mn, Fe, Cr) |  | 106.58, 56.78,<br>16.43, 24.40<br>F g <sup>-1</sup> | 1 A g <sup>-1</sup> | 13 |
|-----------------------------------------|--|-----------------------------------------------------|---------------------|----|

---

**Non perovskite materials**

---

|                                                                                 |                                    |                          |                        |                            |    |
|---------------------------------------------------------------------------------|------------------------------------|--------------------------|------------------------|----------------------------|----|
| Ni <sub>0.67</sub> Co <sub>0.33</sub> Se                                        | 6 M KOH                            | 535 F g <sup>-1</sup>    | 1 A g <sup>-1</sup>    | 82 % after 2,000<br>cycles | 14 |
| Ni-Co-P                                                                         | 3 M KOH +<br>0.5 M LiOH            | 1448 F g <sup>-1</sup>   | 1 A g <sup>-1</sup>    |                            | 15 |
| Ni-Co-F                                                                         | 3 M KOH +<br>0.5 M LiOH            | 564 F g <sup>-1</sup>    | 1 A g <sup>-1</sup>    |                            | 16 |
| NiCo <sub>2</sub> O <sub>4</sub>                                                | 6 M KOH                            | 351 F g <sup>-1</sup>    | 1 A g <sup>-1</sup>    |                            | 17 |
| Ni-P@NiCo <sub>2</sub> O <sub>4</sub>                                           | 3 M KOH +<br>0.5 M LiOH            | 1240 F g <sup>-1</sup>   | 1 A g <sup>-1</sup>    |                            | 18 |
| NixCo <sub>2-x</sub> P                                                          | 6 M KOH                            | 571 F g <sup>-1</sup>    | 1 A g <sup>-1</sup>    |                            | 19 |
| CoMoO <sub>4</sub> -<br>NiMoO <sub>4</sub> •xH <sub>2</sub> O                   | 2 M KOH                            | 1039 F g <sup>-1</sup>   | 1 A g <sup>-1</sup>    |                            | 20 |
| NiCo <sub>2</sub> S <sub>4</sub> @Ni <sub>3</sub> V <sub>2</sub> O <sub>8</sub> | 6 M KOH                            | 512 C g <sup>-1</sup>    | 1 A g <sup>-1</sup>    |                            | 21 |
| NiCo <sub>2</sub> S <sub>4</sub> /Co <sub>9</sub> S <sub>8</sub>                | 6 M KOH                            | 749 F g <sup>-1</sup>    | 4 A g <sup>-1</sup>    |                            | 22 |
| NiCo <sub>2</sub> O <sub>4</sub> @NiWO <sub>4</sub>                             | 6 M KOH                            | 1384 F g <sup>-1</sup>   | 1 A g <sup>-1</sup>    |                            | 23 |
| Co-Ni-W-B-<br>O/20rGO                                                           | 6 M KOH                            | 1189.1 F g <sup>-1</sup> | 1 A g <sup>-1</sup>    |                            | 24 |
| OMC/MoO <sub>2</sub>                                                            | 1 M H <sub>2</sub> SO <sub>4</sub> | 37 mA h g <sup>-1</sup>  | 0.2 A cm <sup>-2</sup> |                            | 25 |

## References

1. R. Ding, X. Li, W. Shi, Q. Xu, X. Han, Y. Zhou, W. Hong and E. Liu, *J. Mater. Chem. A*, 2017, **5**, 17822-17827.
2. W. Shi, R. Ding, X. Li, Q. Xu, D. Ying, Y. Huang and E. Liu, *Chem. Eur. J.*, 2017, **23**, 15305-15311.
3. L. Zhu, Y. Liu, C. Su, W. Zhou, M. Liu and Z. Shao, *Angew. Chem. Int. Ed.*, 2016, **128**, 9728-9731.
4. M. Wohlfahrt-Mehrens, J. Schenk, P. Wilde, E. Abdelmula, P. Axmann and J. Garche, *J. Power Sources*, 2002, **105**, 182-188.
5. C. Lokhande, T. Gujar, V. Shinde, R. S. Mane and S.-H. Han, *Electrochem. Commun.*, 2007, **9**, 1805-1809.
6. A. Sarkar, A. K. Singh, D. Sarkar, G. G. Khan and K. Mandal, *ACS Sustainable Chem. Eng.*, 2015, **3**, 2254-2263.
7. D. K. Hwang, S. Kim, J.-H. Lee, I.-S. Hwang and I.-D. Kim, *J. Mater. Chem.*, 2011, **21**, 1959-1965.
8. K. Liang, N. Wang, M. Zhou, Z. Cao, T. Gu, Q. Zhang, X. Tang, W. Hu and B. Wei, *J. Mater. Chem. A*, 2013, **1**, 9730-9736.
9. X. Wang, Q. Zhu, X. Wang, H. Zhang, J. Zhang and L. Wang, *J. Alloys Compd.*, 2016, **675**, 195-200.
10. J. Lü, Y. Zhang, Z. Lü, X. Huang, Z. Wang, X. Zhu and B. Wei, *RSC Adv.*, 2015, **5**, 5858-5862.
11. Y. Cao, B. Lin, Y. Sun, H. Yang and X. Zhang, *Electrochim. Acta*, 2015, **174**, 41-50.
12. Y. Cao, B. Lin, Y. Sun, H. Yang and X. Zhang, *J. Alloys Compd.*, 2015, **624**, 31-39.
13. N. Arjun, G.-T. Pan and T. C. Yang, *Results Phys.*, 2017, **7**, 920-926.
14. H. Chen, S. Chen, M. Fan, C. Li, D. Chen, G. Tian and K. Shu, *J. Mater. Chem. A*, 2015, **3**, 23653-23659.
15. R. Ding, X. Li, W. Shi, Q. Xu and E. Liu, *Chem. Eng. J.*, 2017, **320**, 376-388.
16. X. Li, R. Ding, W. Shi, Q. Xu and E. Liu, *Chem. Eur. J.*, 2017, **23**, 6896-6904.
17. R. Ding, L. Qi, M. Jia and H. Wang, *Electrochim. Acta*, 2013, **107**, 494-502.
18. X. Li, R. Ding, L. Yi, W. Shi, Q. Xu and E. Liu, *Electrochim. Acta*, 2016, **222**, 1169-1175.
19. Y.-M. Hu, M.-C. Liu, Y.-X. Hu, Q.-Q. Yang, L.-B. Kong and L. Kang, *Electrochim. Acta*, 2016, **215**, 114-125.
20. M.-C. Liu, L.-B. Kong, C. Lu, X.-J. Ma, X.-M. Li, Y.-C. Luo and L. Kang, *J. Mater. Chem. A*, 2013, **1**, 1380-1387.
21. L. Niu, Y. Wang, F. Ruan, C. Shen, S. Shan, M. Xu, Z. Sun, C. Li, X. Liu and Y. Gong, *J. Mater. Chem. A*, 2016, **4**, 5669-5677.
22. L. Hou, Y. Shi, S. Zhu, M. Rehan, G. Pang, X. Zhang and C. Yuan, *J. Mater. Chem. A*, 2017, **5**, 133-144.
23. S. Xu, Y. Chen, Y. Li, A. Lu, Y. Yao, J. Dai, Y. Wang, B. Liu, S. D. Lacey and G. R. Pastel, *Nano Lett.*, 2017, **17**, 5817-5822.
24. C. Xiang, Q. Wang, Y. Zou, P. Huang, H. Chu, S. Qiu, F. Xu and L. Sun, *J. Mater. Chem. A*, 2017, **5**, 9907-9916.
25. Y. Zhou, C. W. Lee and S. Yoon, *Electrochem. Solid-State Lett.*, 2011, **14**, A157-A160.
